# Supplementary material for: Association of Rho-associated protein kinase 1 with E-cadherin complexes is mediated by p120-catenin
Source: PubMed Central journal article supplement — Mol Biol Cell. 2012 Jan 1;23(1):99–110. doi: 10.1091/mbc.E11-06-0497 (PMC3248908; doi:10.1091/mbc.e11-06-0497), 2012-01-01
Supplement: supp_E11-06-0497_CombinedSupMats.pdf [file supp_E11-06-0497_CombinedSupMats.pdf]

Supplemental Figure S1

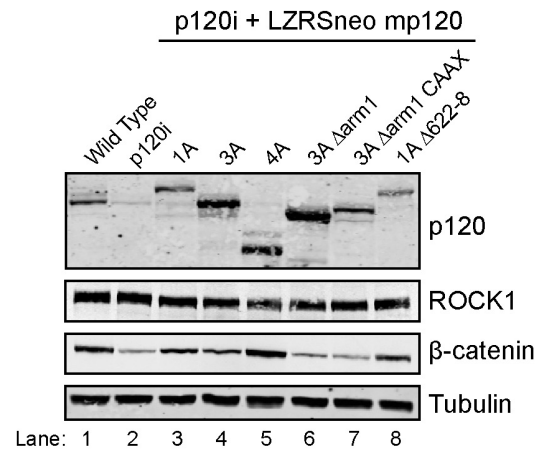

**Figure S1: p120 depletion and reconstitution does not affect ROCK1 levels.** Western blot analysis of p120, ROCK1,  $\beta$ -catenin, and Tubulin in Wild Type A431 cells, p120-depleted A431 cells (p120i), of p120i cells expressing the indicated murine p120 isoforms. Lane 1: Wild-Type A431 cells, lane 2: p120i A431 cells transduced with LZRS neo vector alone, lanes 3-8: p120i cells expressing mp120 1A (lane 3), mp120 3A (lane 4), mp120 4A (lane 5) mp120 3A  $\Delta$ arm1 (lane 6), mp120 3A  $\Delta$ arm1 CAAX (lane 7), mp120 1A  $\Delta$ 622-628.

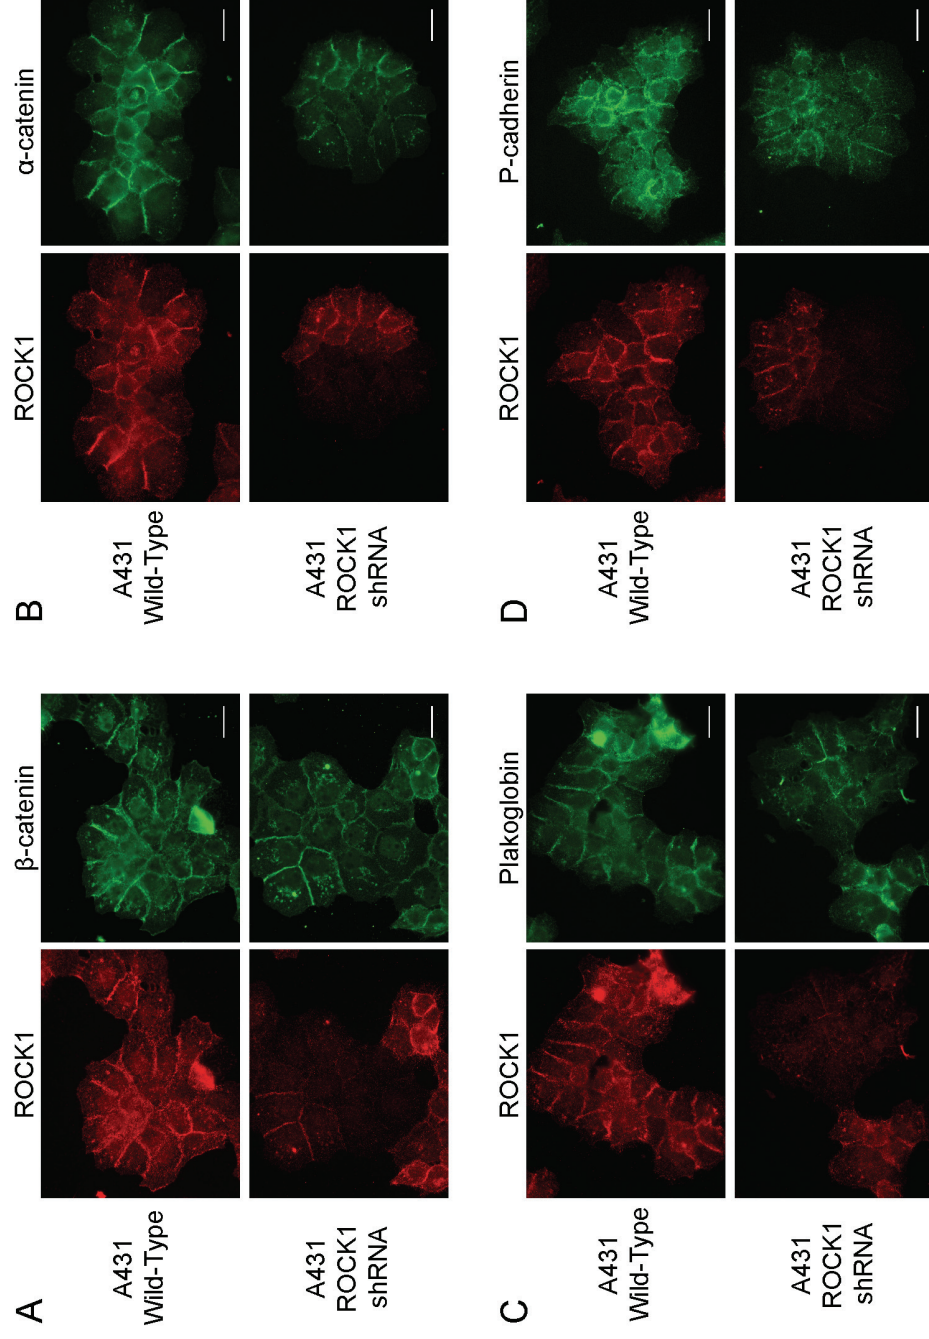

**Figure S2: ROCK1 depletion affects the entire cadherin complex.** Immunofluorescence analysis of ROCK1 (red) and  $\beta$ -catenin (A),  $\alpha$ -catenin (B), Plakoglobin (C), and P-cadherin (D) in wild-type A431 cells and A431 cells expressing ROCK1 shRNA. Scale bar represents 10  $\mu$ m.

Supplemental Figure S3

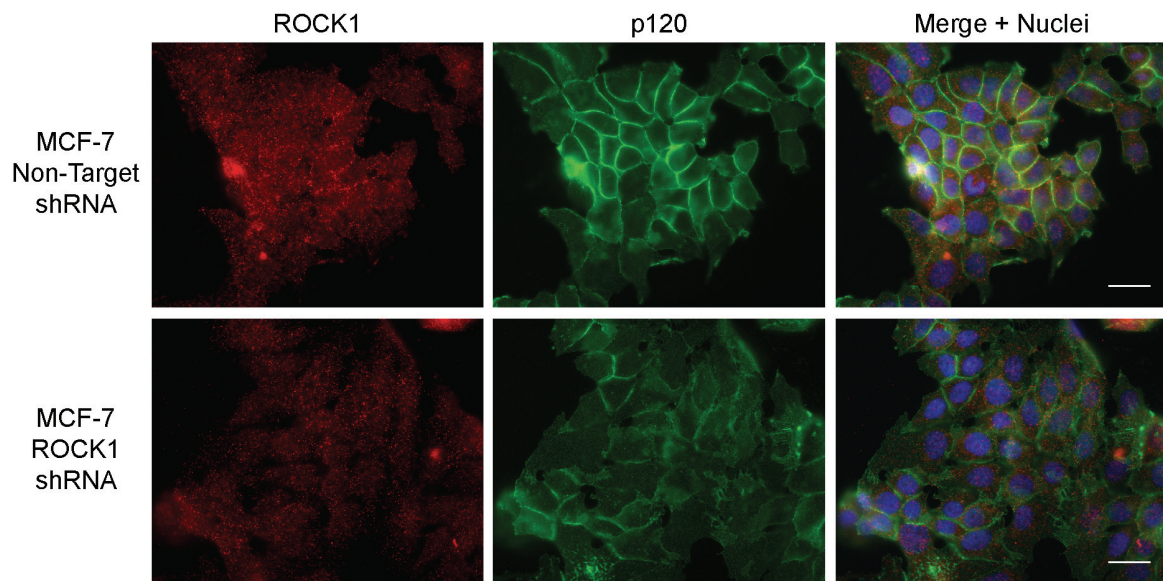

**Figure S3: ROCK1 depletion in MCF-7 cells affects p120 distribution.**  
Immunofluorescence analysis of ROCK1 (red) and p120 (green) in MCF-7 cells expressing Non-Target shRNA or ROCK1 shRNA. Scale bar represents 10  $\mu$ m.

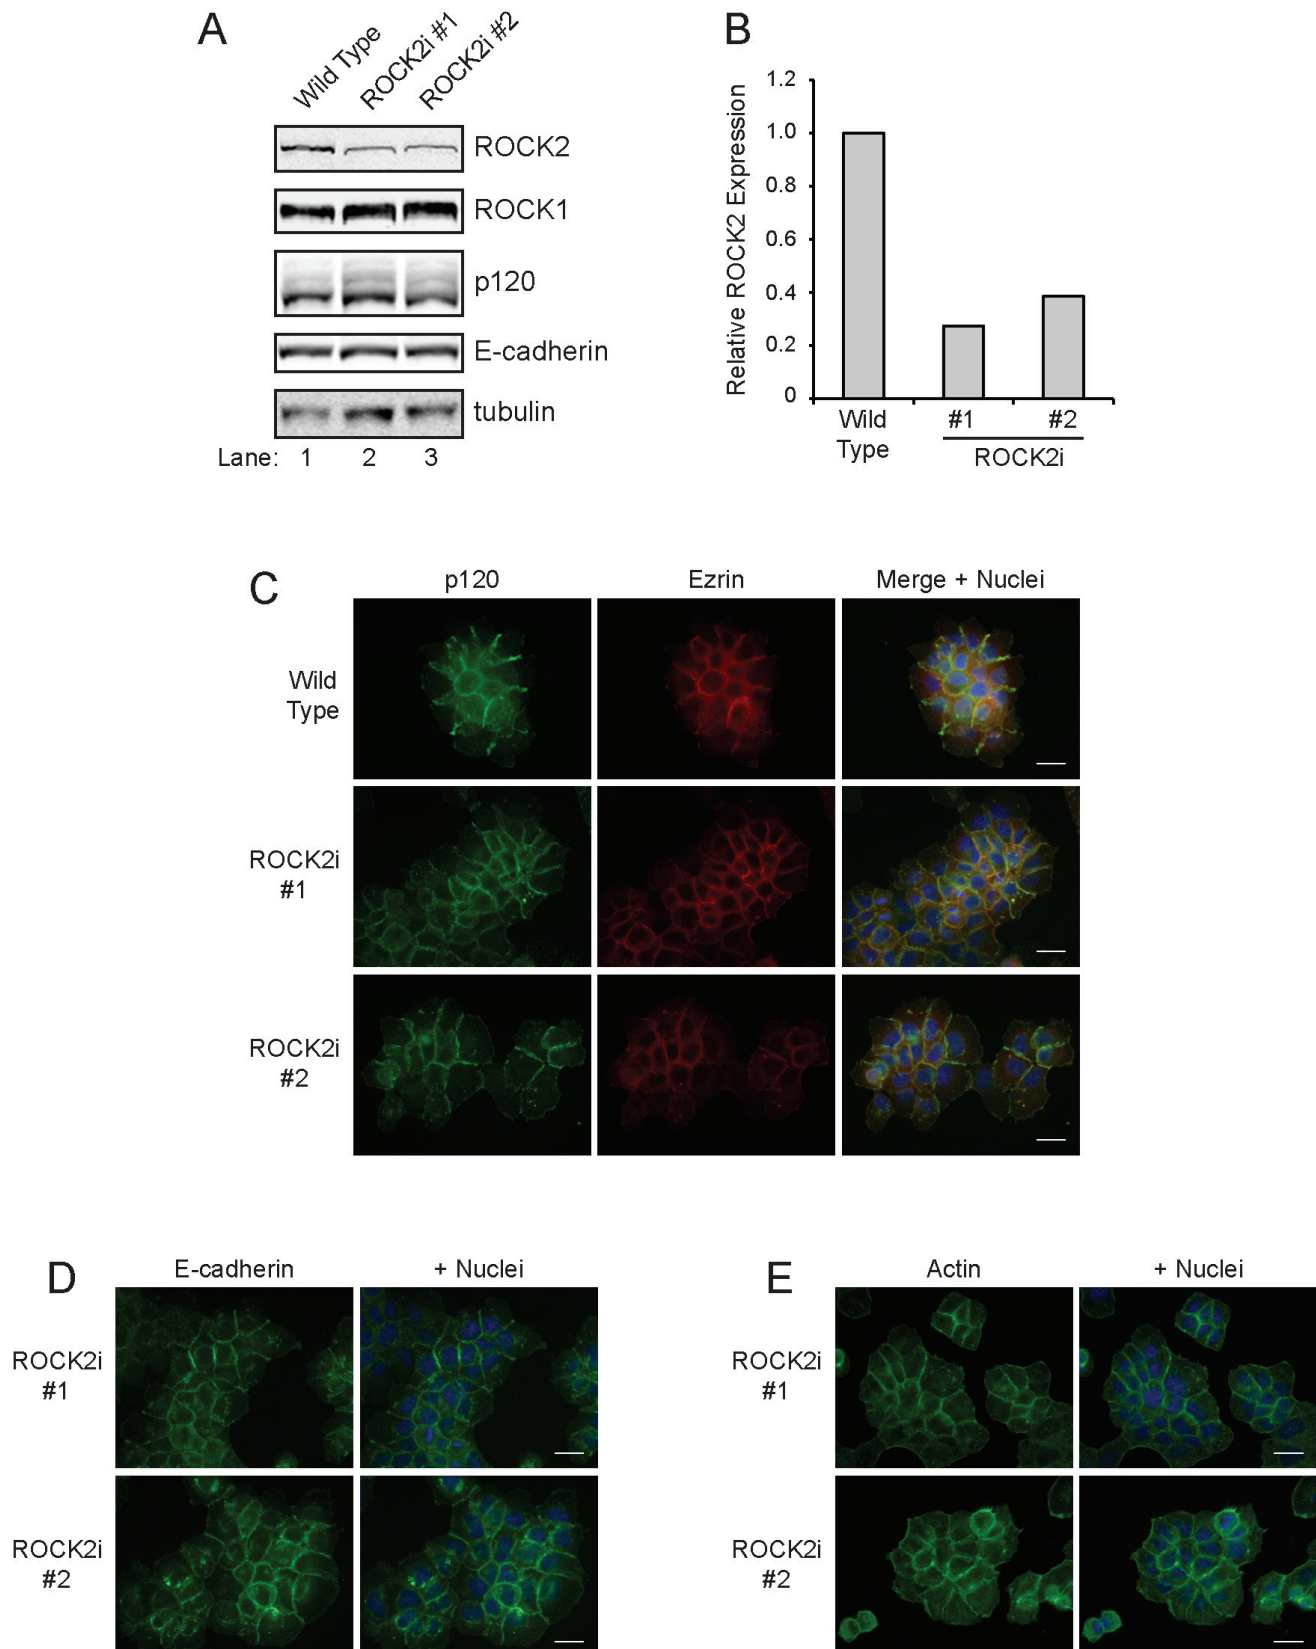

**Figure S4: Knockdown of ROCK2 does not affect cell-cell adhesion.** (A) Western blot analysis of wild-type A431 cells (lane 1) and those expressing two different ROCK2 shRNA constructs (ROCK2i #1 & #2, lanes 2 & 3). (B) Relative levels of ROCK2 from cells in (A), normalized to tubulin. (C-E) Effects of ROCK2 depletion. Immunofluorescence analysis of p120 and Ezrin (C), E-cadherin (D), and actin (E) in wild-type and ROCK2 knockdown cells. Scale bars represent 10  $\mu$ M.

**Table S1: ROCK1 peptides detected in MCF-7, MCF-10A, and Caco-2 cells by ReCLIP.**

| <b>MCF-7</b>    |                 |                     |
|-----------------|-----------------|---------------------|
| <i>Peptide</i>  | <i>Position</i> | <i>ROCK Domain</i>  |
| AESEQLAR        | 899-906         | Coiled-coil         |
| VSQNSQLANEK     | 529-539         | Coiled-coil         |
| ITSLQEEVK       | 631-639         | Coiled-coil         |
| LEEANSMLTK      | 941-950         | Coiled-coil (RBD)   |
| LLQNELK         | 784-791         | Coiled-coil         |
| SISQLESLNR      | 574-583         | Coiled-coil         |
| GAFGEVQLVR      | 85-94           | Kinase              |
| VSYDVTSAR       | 1285-1293       | PH                  |
| YLSSANPNDNR     | 405-415         | Coiled-coil         |
| LADFGTCMK       | 214-222         | Kinase              |
| DRGHDSEMIGDLQAR | 616-630         | Coiled-coil         |
| SLQESLQK        | 423-430         | Coiled-coil         |
| <b>MCF10A</b>   |                 |                     |
| <i>Peptide</i>  | <i>Position</i> | <i>ROCK1 Domain</i> |
| YLSSANPNDNR     | 405-415         | Coiled-coil         |
| STANQSFR        | 1336-1343       | C-terminus          |
| VSYDVTSAR       | 1285-1293       | PH                  |
| NELQMQLASK      | 1074-1083       | Coiled-coil         |
| DRGHDSEMIGDLQAR | 616-630         | Coiled-coil         |
| VSQNSQLANEK     | 529-539         | Coiled-coil         |
| ITSLQEEVK       | 631-639         | Coiled-coil         |
| TQAFEADNLK      | 792-801         | Coiled-coil         |
| DVKPDNMLLDK     | 198-208         | Kinase              |
| NSLTFPDDNDISK   | 295-307         | Kinase              |
| SISQLESLNR      | 574-583         | Coiled-coil         |
| GAFGEVQLVR      | 85-94           | Kinase              |
| <b>Caco-2</b>   |                 |                     |
| <i>Peptide</i>  | <i>Position</i> | <i>ROCK1 Domain</i> |
| TQAFEADNLK      | 792-801         | Coiled-coil         |
| SISQLESLNR      | 574-583         | Coiled-coil         |
| VSYDVTSAR       | 1285-1293       | PH                  |
| GAFGEVQLVR      | 85-94           | Kinase              |

Unique peptides detected by LC-MS/MS in each cell line are shown with the corresponding amino-acid position and ROCK1 domain.

**Table S2: p190A RhoGAP peptides identified in MCF-7 by ReCLIP.**

| <i>p190A RhoGAP Peptide</i> | <i>Position</i> |
|-----------------------------|-----------------|
| GDLSYLDQGHR                 | 1054-1064       |
| NLNLVSSTASIK                | 764-775         |
| MGVIQDVLGEEQR               | 517-529         |
| NLQVVETSAR                  | 222-231         |
| STALQPYIK                   | 110-118         |
| FVSNLYNQLAK                 | 180-190         |
| ESLSYVVESIEK                | 669-680         |
| NEEENIYSVPHDSTQGK           | 1099-1115       |
| NSLSDPNIDR                  | 588-597         |
| DLADVDLR                    | 776-783         |
| INLVILGK                    | 598-605         |

Unique p190A RhoGAP peptides detected by LC-MS/MS across four separate p120 ReCLIP experiments in MCF-7 cells are shown with the corresponding amino-acid position.
